# Supplementary material for: Ultrathin NiCo2O4nanosheets grown on three-dimensional interwoven nitrogen-doped carbon nanotubes as binder-free electrodes for high-performance supercapacitors
Source: Royal Society of Chemistry journal article supplement (doi:10.1039/c5ta02719e), 2015-01-01
Supplement: c5ta02719e1.pdf [file c5ta02719e1.pdf]

Supporting Information for:

**Ultrathin NiCo<sub>2</sub>O<sub>4</sub> nanosheets grown on three-dimensional interwoven nitrogen-doped carbon nanotubes as binder-free electrodes for high-performance supercapacitors**

Jian Wu<sup>a,b</sup>, Pan Guo<sup>a</sup>, Rui Mi<sup>b</sup>, Xichuan Liu<sup>b</sup>, Hui Zhang<sup>b</sup>, Jun Mei<sup>b</sup>, Hao Liu<sup>\*,b</sup>,  
Woon-Ming Lau<sup>a,b</sup>, Li-Min Liu<sup>\*,a</sup>

<sup>a</sup>Beijing Computational Science Research Center, Beijing 100084, China

<sup>b</sup>Chengdu Green Energy and Green Manufacturing Technology R&D Center,  
Chengdu Development Center of Science and Technology of CAEP, Chengdu,  
Sichuan, 610207, China

\*Corresponding author: [mliuhao@gmail.com](mailto:mliuhao@gmail.com), [limin.liu@csrc.ac.cn](mailto:limin.liu@csrc.ac.cn)

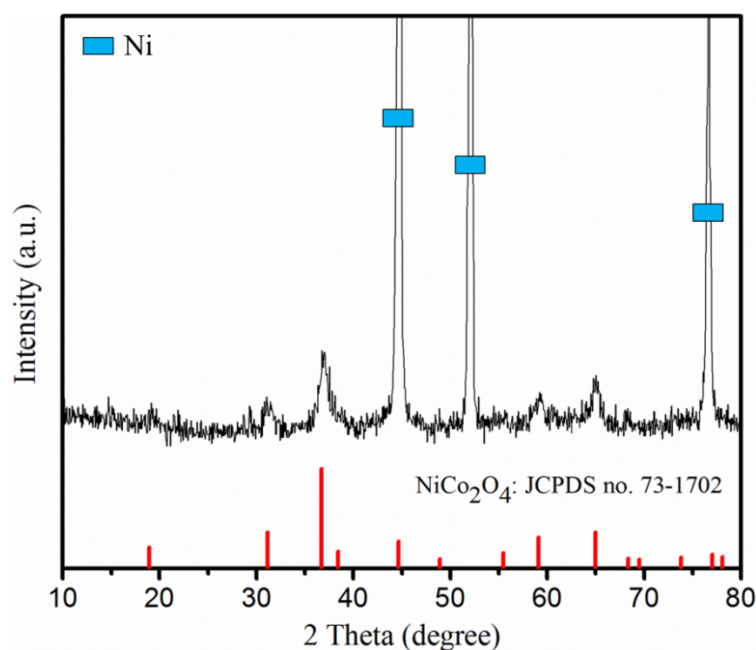

**Fig. S1:** XRD pattern of the Ni foam/NiCo<sub>2</sub>O<sub>4</sub> NS.

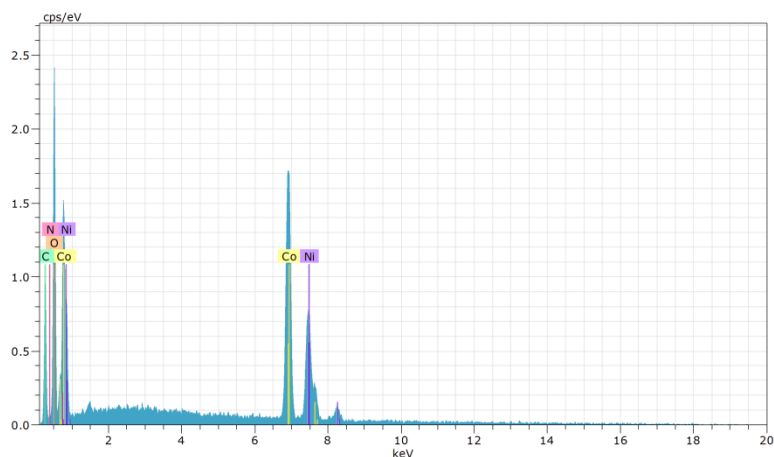

**Fig. S2:** EDX pattern of the N-CNTs/NiCo<sub>2</sub>O<sub>4</sub> NS.

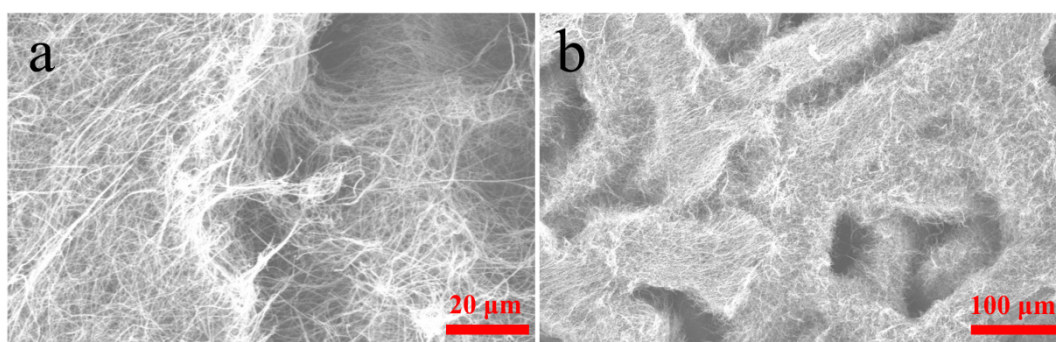

**Fig. S3:** SEM images of N-CNTs grown on Ni foam.

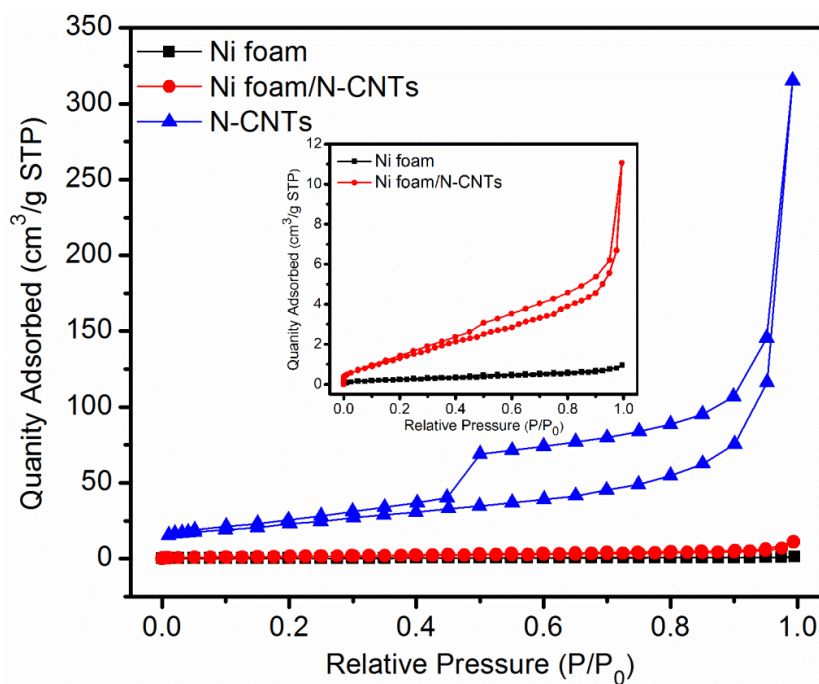

**Fig. S4:** Nitrogen adsorption and desorption isotherm N<sub>2</sub> adsorption–desorption isotherms of the Ni foam, N-CNTs, and Ni foam/N-CNTs.

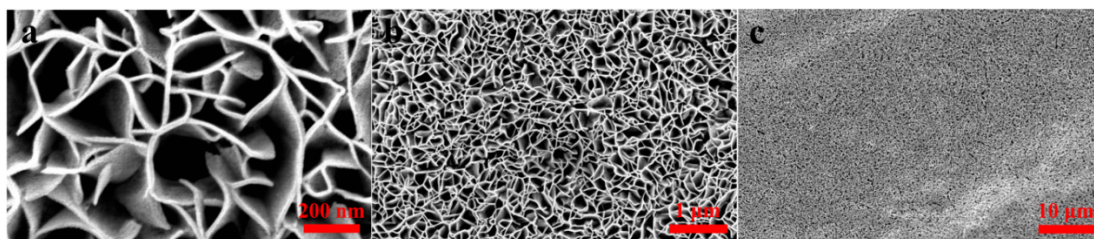

**Fig. S5:** Low- and high-magnification SEM images of the Ni foam/NiCo<sub>2</sub>O<sub>4</sub> NS.

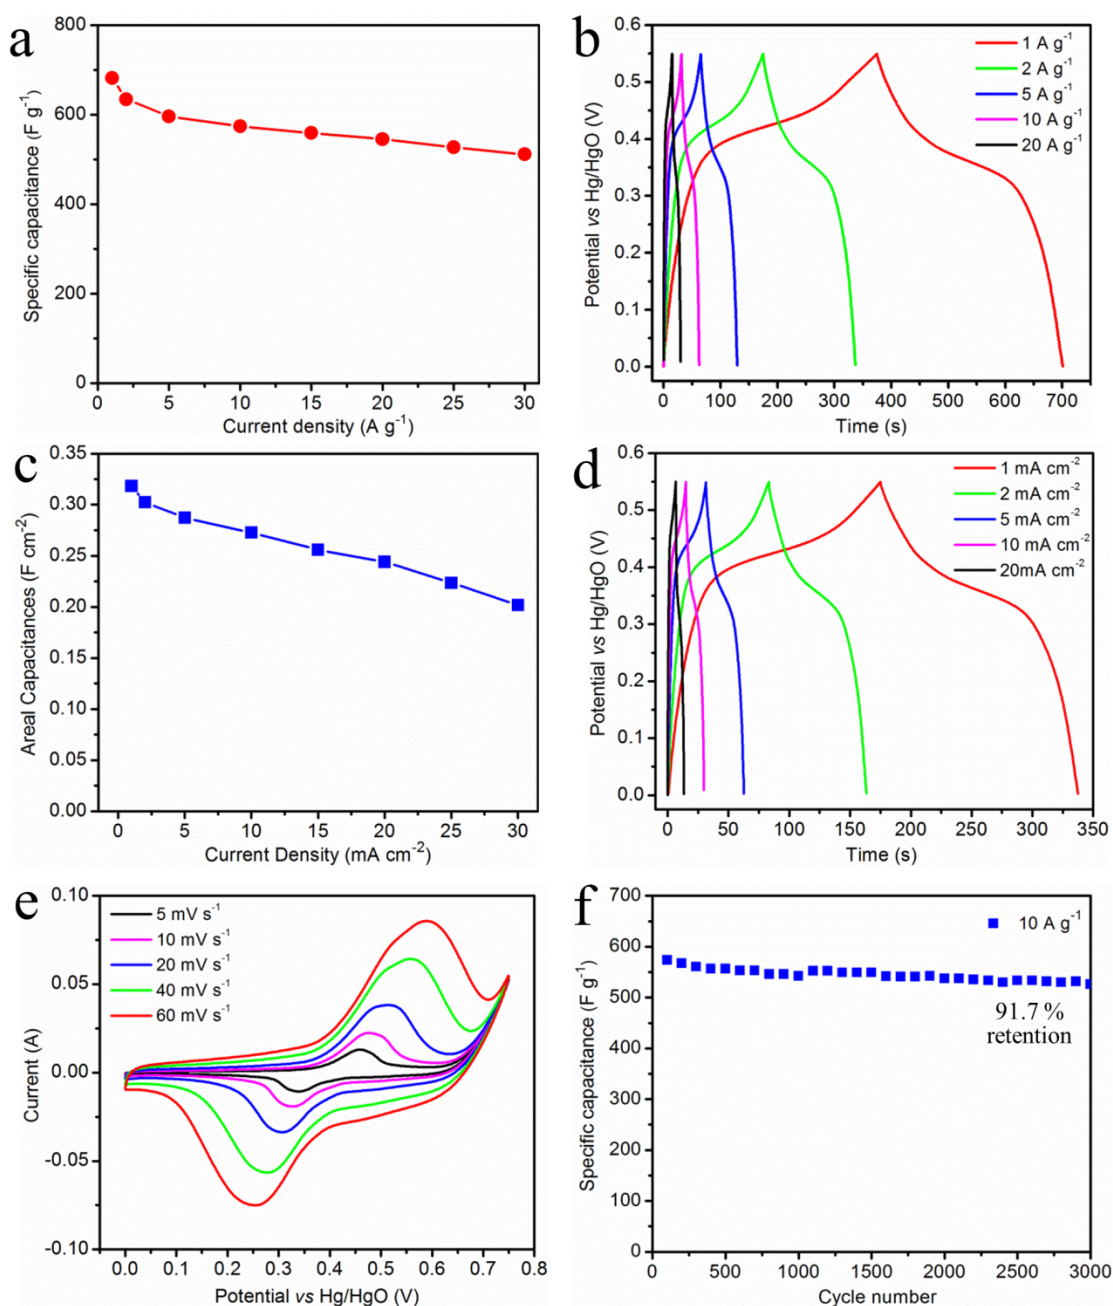

**Fig. S6:** Electrochemical characterizations of the Ni foam/ NiCo<sub>2</sub>O<sub>4</sub> NS electrode: (a) and (c) are the specific capacitances and areal capacitances of the electrode as a



function of current density, respectively. (b) and (d) are the charge and discharge curves at various current densities from 1 to 20 A g<sup>-1</sup> and from 1 to 20 mA cm<sup>-2</sup>, respectively. (e) CV curves at various scan rates from 5 to 60 mV s<sup>-1</sup>. (f) Cycling performance at a high current density of 10 A g<sup>-1</sup>.

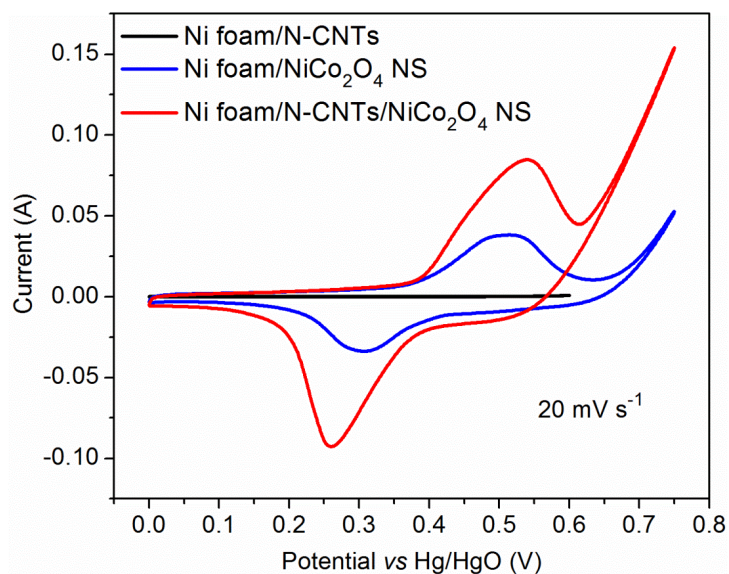

**Fig. S7:** Comparative CV curves of Ni foam/N-CNTs, Ni foam/NiCo<sub>2</sub>O<sub>4</sub> NS and Ni foam/N-CNTs/NiCo<sub>2</sub>O<sub>4</sub> NS at a scan rate of 20 mV s<sup>-1</sup>.

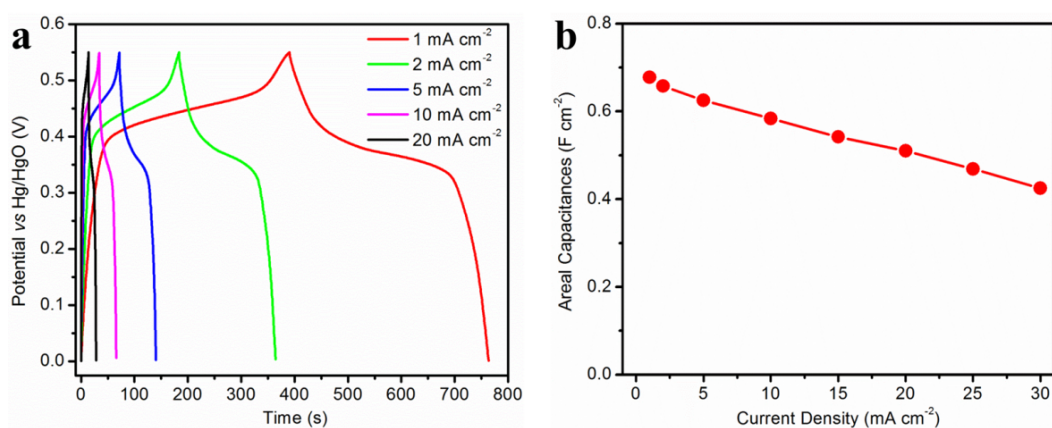

**Fig. S8:** (a) Charge and discharge curves of the 3D Ni foam/N-CNTs/NiCo<sub>2</sub>O<sub>4</sub> NS at different current densities of 1, 2, 5, 10, and 20 mA cm<sup>-2</sup>. (b) Areal capacitances of the electrode as a function of current density.

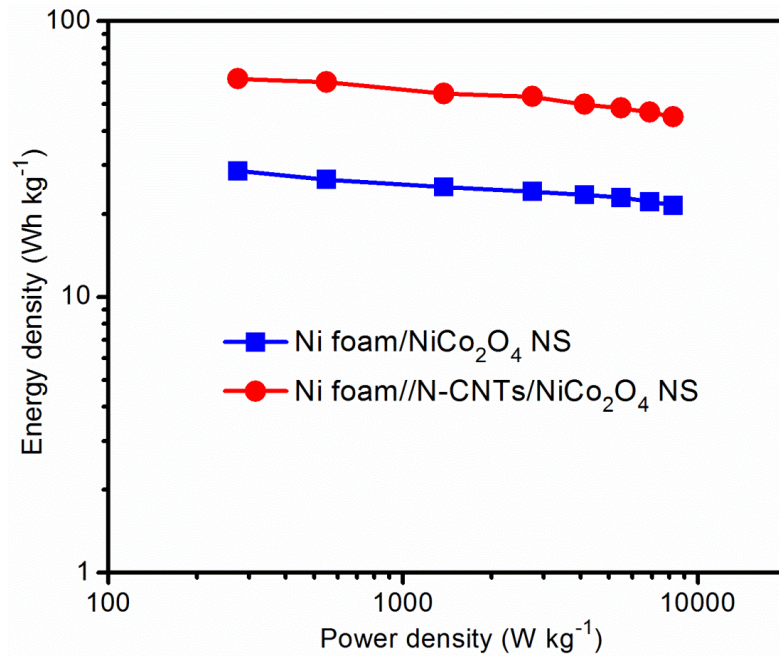

**Fig. S9:** Ragone plot of the power and energy density of the Ni foam/NiCo<sub>2</sub>O<sub>4</sub> NS and Ni foam/N-CNTs/NiCo<sub>2</sub>O<sub>4</sub> NS at different current densities of 1, 2, 5, 10 and 20 A g<sup>-1</sup>.

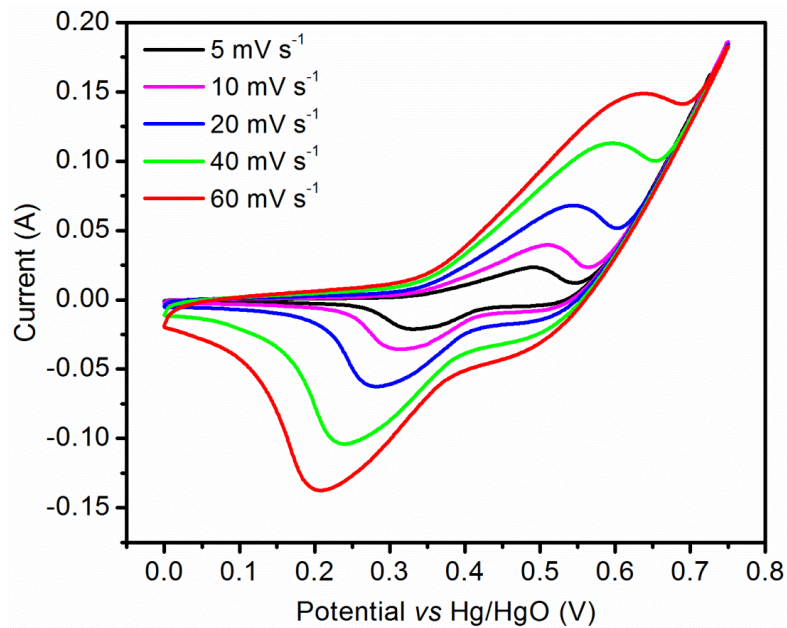

**Fig. S10:** CV curves of the 9000<sup>th</sup> cycle of the 3D Ni foam/N-CNTs/NiCo<sub>2</sub>O<sub>4</sub> NS electrode at various scan rates from 5 to 60 mV s<sup>-1</sup>.
